1 **Measuring arterial pulsatility with Dynamic Inflow MAgnitude Contrast**  
2 **(DIMAC)**

3 Joseph R. Whittaker<sup>1,2\*</sup>, Fabrizio Fasano<sup>3</sup>, Marcello Venzi<sup>1</sup>, Patrick Liebig<sup>4</sup>,  
4 Daniel Gallichan<sup>5</sup>, and Kevin Murphy<sup>1</sup>

5 1. *Cardiff University Brain Research Imaging Centre (CUBRIC), School of Physics and Astronomy,*  
6 *Cardiff University, Cardiff, CF24 4HQ, United Kingdom*

7 2. *Max Planck Institute for Human Cognitive and Brain Sciences, Leipzig, Germany*

8 3. *Siemens Healthcare Ltd, Camberly, United Kingdom*

9 4. *Siemens Healthcare GmbH, Erlangen, Germany*

10 5. *CUBRIC, School of Engineering, Cardiff, United Kingdom*

11

12 **\*Correspondence**

13 *Joseph R. Whittaker*

14 [Whittakerj3@cardiff.ac.uk](mailto:Whittakerj3@cardiff.ac.uk)

15

16 **Keywords: magnetic resonance imaging; pulsatility; cerebral arteries; echo-planar imaging;**  
17 **arterial stiffness; inflow effect; cerebral blood flow velocity**

18 **Highlights:**

- 19 • We present a novel method for measuring pulsatility of cerebral arteries.  
20 • The inflow effect on fast GRE imaging can be exploited to yield a flow velocity dependent  
21 signal.  
22 • We measure pulsatile flow through cerebral arteries dynamically on a beat-to-beat basis.  
23 • We use physiological challenges to demonstrate sensitivity to dynamic and steady-state  
24 changes in vascular tone.

25 **Abstract**

26 Poor arterial health is increasingly recognised as an independent risk factor for  
27 cerebrovascular disease, however there remain relatively few reliable methods for  
28 assessing the function and health of cerebral arteries. In this study, we outline a new  
29 MRI approach to measuring pulsatile flow in cerebral arteries that is based on the  
30 inflow phenomenon associated with fast gradient-recalled-echo acquisitions. Unlike  
31 traditional phase-contrast techniques, this new method, which we dub **Dynamic**  
32 **Inflow MAgnitude Contrast (DIMAC)**, does not require velocity-encoding gradients as

33 sensitivity to flow velocity results purely from the inflow effect. We achieved this  
34 desired effect using a highly accelerated single slice EPI acquisition with very short  
35 TR (15 ms) and a 90° flip angle, thus maximising inflow contrast. Simulating the  
36 spoiled GRE signal in the presence of large arteries and perform a sensitivity  
37 analysis to demonstrate that in the regime of high inflow contrast it shows much  
38 greater sensitivity to flow velocity over blood volume changes. We support this  
39 theoretical prediction with *in-vivo* data collected in two separate experiments  
40 designed to demonstrate the utility of the DIMAC signal contrast. We perform a  
41 hypercapnia challenge experiment in order to experimentally modulate arterial tone  
42 within subjects, and thus modulate the arterial pulsatile flow waveform. We also  
43 perform a thigh-cuff release challenge, designed to induce a transient drop in blood  
44 pressure, and demonstrate that the continuous DIMAC signal captures the complex  
45 transient change in the pulsatile and non-pulsatile components of flow. In summary,  
46 this study proposes a new role for a well established source of MR image contrast,  
47 and demonstrate its potential for measuring both steady-state and dynamic changes  
48 in arterial tone.

## 49 **1. Introduction**

50 Blood flow through large arteries is, due to the action of the heart, pulsatile in nature.  
51 However, elasticity of the arterial wall results in a dampening of this pulsatility,  
52 leading to steady and continuous flow in the microcirculation. This buffering effect of  
53 large arteries serves to protect the capillary bed from damage due to excessive  
54 pulsatile energy. Increased arterial stiffness, i.e. loss of elasticity, is a naturally  
55 occurring process that is mediated by numerous stressors, including mechanical  
56 factors, structural changes and atherosclerosis (Lakatta and Levy, 2003). It is  
57 primarily associated with advanced age, but is also intrinsically linked to primary  
58 hypertension (Verwoert et al., 2014), and is known to be an independent risk factor  
59 for cardiovascular disease (Mitchell et al., 2010; Wilkinson et al., 2015). As compliant  
60 (elastic) arteries act as buffers absorbing pulsatile energy generated by the heart,  
61 this stiffening is thought to have the deleterious effect of allowing pulsatile energy to  
62 propagate down to the microcirculation. Additionally, over a longer time scale  
63 increased shear stress at the endothelial surface stimulates vascular remodelling,

64 which is thought to have the maladaptive consequence of reducing both basal flow  
65 and vascular reactivity (Shirwany and Zou, 2010). As a very highly perfused organ,  
66 the human brain is particularly susceptible to the detrimental effects of poor arterial  
67 health, and so it is unsurprising that there is now mounting evidence to suggest a  
68 causal link between arterial stiffness and cerebrovascular disease (Hughes et al.,  
69 2018; Laurent et al., 2003; Poels et al., 2007; Poels et al., 2012). Furthermore, this  
70 emerging evidence suggests AS plays an independent role in the pathogenesis of  
71 dementia and cognitive impairment with ageing (Rabkin, 2012).

72 Observations over time of cerebral artery intraluminal pressure, cerebral blood  
73 volume (CBV) and cerebral blood flow velocity (CBFV) show fluctuations that span  
74 multiple temporal scales. As the cardiac cycle generates periodic pressure waves, at  
75 the high frequency end of this spectrum CBV and CBFV are characterized as being  
76 pulsatile, with a time period that fluctuates with beat-to-beat changes in heart rate  
77 variability. Direct monitoring of intraluminal blood pressure is inherently invasive, but  
78 there are several ways to noninvasively measure both CBV and CBFV, and analysis  
79 of the pulsatile component of these can be used to infer properties of the arterial  
80 vasculature, including arterial compliance. Transcranial Doppler (TCD) ultrasound  
81 measures CBFV in large cerebral arteries with sufficient temporal resolution to  
82 resolve its pulsatile component, from which an assessment of compliance can be  
83 made, either by modelling pulsatile CBV (Kim et al., 2009), or by analysis of the  
84 pulsatile component of the CBFV waveform itself (Fluck et al., 2014). The ability to  
85 measure arterial flow pulsatility is a major advantage of TCD, and simple metrics  
86 such as the Gosling pulsatility index (PI) provide a crude approximation as to the  
87 degree of pulsatile pressure entering the cranium (Naqvi et al., 2013). However, TCD  
88 has the disadvantage of being limited in sensitivity to only a few large intracranial  
89 arteries, with the proviso that a suitable acoustic window be present in the cranium at  
90 the region of interest. The lack of sensitivity to CBFV in more distal branches of the  
91 large cerebral arterial vasculature prevents direct inference of downstream stiffness,  
92 and thus makes it challenging to gauge how pulsatile pressure propagates  
93 downstream and predict where the microvasculature is most at risk.

94 There are numerous magnetic resonance imaging (MRI) methods that are sensitive  
95 to either CBV or CBFV, and which have been used to estimate compliance of

96 cerebral arteries. Arterial Spin Labelling (ASL) methods have been used to estimate  
97 compliance (Warnert et al., 2015; Yan et al., 2016), but direct measurement of  
98 arterial CBV is not trivial, and existing methods invariably suffer from low SNR.  
99 Phase contrast (PC) based MRI methods yield quantitative estimates of CBFV, and  
100 cardiac gating techniques can be used to resolve the pulsatile component of flow,  
101 from which compliance estimates can be made, e.g. via a surrogate PI metric  
102 similarly to TCD (Berman et al., 2015). PC MRI has fundamentally limited temporal  
103 resolution due to the necessity of velocity encoding gradients (VENC) to effect CBFV  
104 sensitivity, and despite advances in acquisition and reconstruction for 4D flow  
105 methods (Berman et al., 2015; Rivera-Rivera et al., 2017), these still yield only single  
106 time averaged pulsatile waveforms. One major benefit of MRI compared with TCD is  
107 its potential for a wide whole-brain field-of-view (FOV) and sensitivity to flow at  
108 multiple spatial scales, and to this end there has been a growing trend towards  
109 adapting functional MRI (fMRI) methods for spatially mapping pulsatility in the brain  
110 (Atwi et al., 2020; Bianciardi et al., 2016; Tong and Frederick, 2012; Viessmann et  
111 al., 2017). Although easy to implement and widely available, the fMRI signal is a  
112 complex mixture of multiple different physiological factors and is confounded by  
113 numerous non-flow related dynamic phenomena such as physiological motion and  
114 magnetic susceptibility effects.

115 Here we outline a new approach to measuring dynamic pulsatile flow through  
116 arteries, which is based on the dynamic effect of the inflow phenomenon on the  
117 magnitude of the spoiled gradient-recalled-echo (GRE) MRI signal, here termed  
118 **Dynamic Inflow MAgnitude Contrast (DIMAC)**. The purpose of this study is to  
119 reconsider a well-established source of image contrast, namely flow related  
120 enhancement, and explore how it may be utilised to measure arterial pulsatile flow  
121 dynamically, on a continuous beat-to-beat basis. To this end, we outline a theoretical  
122 motivation using simulations and a sensitivity analysis, and then follow this up with  
123 *in-vivo* demonstrations in which physiology is manipulated.

124

125

126

## 127 **2. Methods**

### 128 **2.1. Theory**

#### 129 2.1.1. Inflow effect

130 The inflow phenomenon, also called time-of-flight (TOF) effect, is fundamental to the  
131 nuclear magnetic resonance (NMR) method. Even before the advent of MRI, it had  
132 been shown that the apparent longitudinal magnetisation relaxation time  $T_1$  of  
133 flowing spin is shorter than stationary ones (Suryan, 1951). This phenomenon is  
134 exploited in order to visualize vascular networks in the form of TOF angiography,  
135 which is used clinically in the diagnosis of cerebral and coronary vascular  
136 abnormalities (Hartung et al., 2011). The mechanism behind the effect is partial  
137 saturation of the longitudinal magnetisation of stationary spins due to continual short  
138 interval RF excitation (i.e. short repetition time (TR)). In contrast, spins flowing into  
139 the imaging plane/slab do not experience this saturation effect to the same degree  
140 and so produce a stronger signal. In the extreme case of very high flow velocities (or  
141 thin slices), spins are completely refreshed between RF pulses, and so the fully  
142 relaxed equilibrium magnetisation is available to be measure in the transverse plane.  
143 In the more general case, assuming transverse magnetisation is spoiled after  
144 readout, different spin isochromats reach different steady states of longitudinal  
145 magnetisation determined by their flow velocity.

146 The literature already includes detailed quantitative analysis of the short TR spoiled  
147 GRE MRI signal steady state (Brown et al., 2014), including the effect of flow velocity  
148 in non-static spins (Bianciardi et al., 2016; Gao et al., 1988). In the simplest case in  
149 which a slice of thickness  $L$  is orientated perpendicularly to a blood vessel, which  
150 can be modelled as a cylinder, assuming plug flow and a  $90^\circ$  flip angle, the  
151 longitudinal magnetisation scales linearly with velocity  $v$  and is given by

$$M_z = M_0 \left( 1 - e^{-\frac{TR}{T_1}} + e^{-\frac{TR}{T_1}} \frac{v}{v_c} \right) \quad 0 < v < v_c$$
$$M_z = M_0 \quad v_c \geq v$$

152

**Equation 1**

153 where  $M_0$  is the equilibrium magnetisation, and  $v_c$  is the critical velocity, above which  
154 the flowing spins experience only one RF pulse when crossing the excited slice. The  
155 measured signal is simply scaled by the spin density/volume and a transverse  
156 relaxation factor. The critical velocity  $v_c$  is determined by the ratio of slice thickness  
157 and TR ( $L/TR$ ). If  $v > v_c$  there is no longer flow dependence, and the longitudinal  
158 magnetization remains at equilibrium, in the steady state. Based on this theory, if  $v <$   
159  $v_c$  we hypothesise that fast spoiled GRE sequences may prove very useful for  
160 measuring pulsatile flow in arteries with high temporal resolution.

### 161 2.1.2. Sensitivity analysis - simulations

162 The cardiac induced pressure waveform that propagates through the vasculature  
163 consequently leads to pulsatile flow in arteries (Wagshul et al., 2011), which  
164 manifests as pulsatile changes in both CBV and CBFV. In this section, we perform  
165 simulations to assess the sensitivity of the spoiled GRE signal to pulsatile changes in  
166 CBFV and CBV. The cardiac phase ( $\tau$ ) dependent signal can be modelled simply as  
167 the sum of intraluminal ( $i$ ) and extraluminal ( $e$ ) compartments

$$M_{xy}(\tau) = M_{z,i}(CBFV(\tau)) \cdot \rho_i \cdot v_i(\tau) \cdot e^{-R_{2,i}^*TE} + M_{z,e} \cdot \rho_e \cdot (1 - v_i(\tau)) \cdot e^{-R_{2,e}^*TE}$$

### 168 **Equation 2**

169 where  $M_z$  is the longitudinal magnetization defined in equation 1 (which is a function  
170 of CBFV for intraluminal spins),  $\rho$  is the spin density for the respective  
171 compartments, and  $v_i$  is the intraluminal volume (i.e. CBV). Cardiac pulsatile  
172 physiology dictates that both CBV and CBFV are functions of  $\tau$ , and so too is the  
173 measured signal. The maxima of CBFV and CBV occur during the systolic peak  
174 (*sys*) of the cardiac phase, with baseline values observed during the diastolic (*dia*)  
175 portion. If during baseline a voxel is entirely contained within the vessel lumen (i.e.  
176  $v_i(\tau_{dia}) = 1$ ), then the measured signal will be sensitive only to changes in CBFV  
177 over the cardiac cycle. Thus, the signal is only sensitive to pulsatile CBV in voxels  
178 with an extraluminal partial volume (i.e.  $v_i(\tau_{dia}) < 1$ ), and the degree to which  
179 depends on both the baseline partial volume and the maximum partial volume (i.e.  
180 systolic peak).

181 We simulate the conditions for a single voxel (with dimensions 2x2x10 mm)  
182 orientated perpendicularly to the middle cerebral artery (MCA), which we model as a  
183 straight cylinder. All MR simulation parameters are listed in Table 1. MCA CBFV  
184 varies both with cardiac cycle (i.e. pulsatility), but also across the vessel lumen due  
185 to the laminar flow profile, being strictly 0 at the vessel wall, and peaking during  
186 systole at the centre. Thus, CBFV was allowed to vary in the range between 0 – 100  
187  $\text{cm s}^{-1}$  to provide a realistic distribution of flow velocities (O'Rourke et al., 2020).  
188 Measuring *in-vivo* diameter changes within intracranial arteries is challenging, but  
189 high-resolution images obtained with ultra-high field MR provide the best estimates.  
190 Using this technique, it has been estimated that the MCA changes in cross sectional  
191 area by ~2.5% over the cardiac cycle (Warnert et al., 2016). Assuming a perfect  
192 cylinder this translates to a change in CBV of the same magnitude. For simulations,  
193 we assumed that CBV could increase by up to 5% of its baseline *diastolic* value.  
194 Using the above physiological ranges we assess the global sensitivity of the DIMAC  
195 signal to changes in CBFV and CBV as follows;

- 196 1. We define baseline CBFV and CBV values and calculate the signal magnitude  
197 (S).
- 198 2. We then randomly sample (1000 samples)  $\Delta\text{CBFV}$  and  $\Delta\text{CBV}$  values  
199 uniformly from the physiological plausible range and calculate the change in  
200 signal from baseline ( $\Delta\text{S}$ ).
- 201 3. We then regress  $\Delta\text{S}$  against  $\Delta\text{CBFV}$  and  $\Delta\text{CBV}$  (normalized between 0 and 1)  
202 to estimate regression coefficients that are in units of  $\Delta\text{S}$  per dynamic range of  
203 CBFV and CBV.
- 204 4. The ratio of the regression coefficients ( $\Delta\text{S}/\Delta\text{CBFV}$  divided by  $\Delta\text{S}/\Delta\text{CBV}$ )  
205 expresses the relative sensitivity to pulsatile changes in CBFV over CBV.

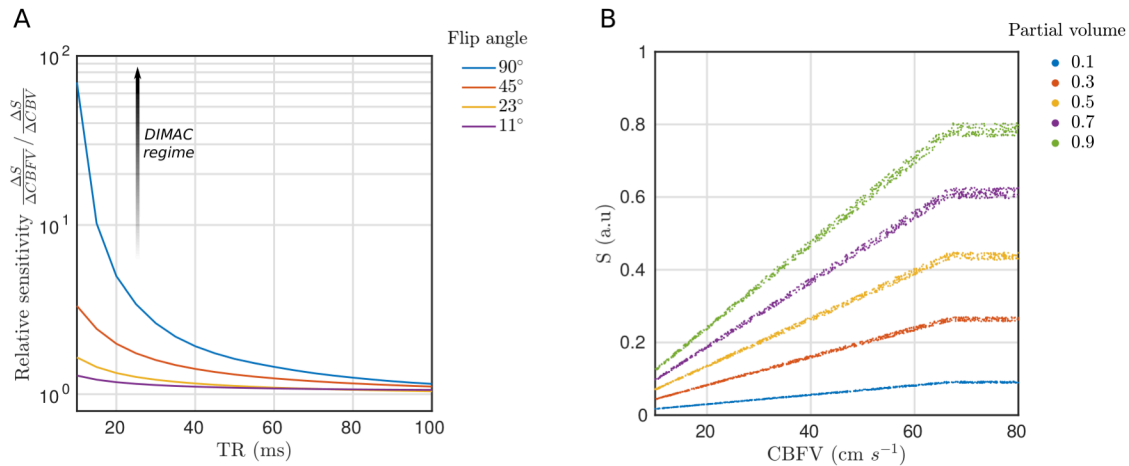

206

207 **Figure 1: A) Relative sensitivity of spoiled GRE signal to pulsatile CBFV compared with pulsatile CBV,**  
 208 **where each line represents a different flip angle. The annotated arrow represents how the GRE signal**  
 209 **moves into the DIMAC regime of high sensitivity to pulsatile CBFV over pulsatile CBV as TR decreases**  
 210 **and flip angle increases. B) Simulated spoiled GRE signal in the DIMAC regime of low TR (15 ms) and**  
 211 **high flip angle (90°). Note that signal variance due to pulsatile CBV is small compared with variance**  
 212 **due to CBFV within the normal physiological range. In every case the signal plateaus at the critical velocity 66**  
 213 **cm s<sup>-1</sup>, i.e. when flow velocity increases to the point when spins only experience a single RF pulse and**  
 214 **the signal becomes sensitive to CBV alone.**

| Parameter              | Value   | Reference                       | Comment                       |
|------------------------|---------|---------------------------------|-------------------------------|
| Arterial blood $T_1$   | 1664 ms | (Lu et al., 2004)               | At Hct = 0.42                 |
| Arterial blood $T_2^*$ | 48.4 ms | (Zhao et al., 2007)             | At $sO_2=98\%$ and Hct = 0.44 |
| CSF $T_1$              | 3817 ms | (Lu et al., 2005)               |                               |
| CSF $T_2^*$            | 400 ms  | (Pinto et al., 2020)            |                               |
| Arterial blood $\rho$  | 0.85    | (Herscovitch and Raichle, 1985) | Assume Hct = 0.44             |
| CSF $\rho$             | 1       |                                 | Assume like water             |

215 **Table 1: MR parameters for simulation at 3T.**

216 Fig. 1A shows the relative sensitivity of the GRE MRI signal as a function of TR for  
 217 different flip angles. The sensitivity to CBFV increases rapidly as TR is decreased,  
 218 and this is most pronounced for the maximum  $\alpha=90^\circ$ . Thus, we define the “DIMAC  
 219 regime” as this region of the GRE parameter space that engenders high sensitivity to



220 pulsatile CBFV. Fig.1B shows the simulated signal plotted as a function of CBFV in  
221 the case of  $\alpha=90^\circ$  and  $TR=15$  ms, where it can be clearly seen that the effect of  
222 pulsatile CBV is very small compared to CBFV when  $v < v_c$ , which in this simulation  
223 is 66cm/s. When  $v > v_c$ , all flow sensitivity is lost and the signal is purely sensitive to  
224 changes in CBV, although at a much reduced dynamic range. It is also evident that  
225 the two parameters are coupled so that the dynamic range of CBV signal variance  
226 scales with CBFV, and that the magnitude of the signal is dependent on baseline  
227 partial volume. These results suggest that in the DIMAC regime of high saturation  
228 ( $TR=15$ ms,  $flip=90^\circ$ ), partial volume of arterial blood merely scales the overall signal  
229 magnitude, which is always relatively more sensitive to pulsatile CBFV over CBV.  
230 This is clearly also a reflection of the physiology of large cerebral arteries, i.e. they  
231 have high CBFV, but are relatively stiff and thus only exhibit small pulsatile CBV.

### 232 2.1.3 Impact of SNR

233 We simulated different levels of SNR to explore how the predictions of the sensitivity  
234 analysis would translate to the *in-vivo* scenario. The beat-to-beat pulsatile CBFV is  
235 modelled with a Fourier basis set as

$$CBFV(\tau) = CBFV_{dia} + \sum_{n=1}^N c_n \cdot e^{i \frac{2\pi n \tau}{P}}$$

### 236 Equation 3

237 where  $CBFV_{dia}$  is the baseline (i.e. dc component) during diastole,  $P$  is the beat-to-  
238 beat time period, and  $n$  is the harmonic of the fundamental frequency. A total of  
239  $N = 10$  harmonics were used taken from (Yang et al., 2019) in order to model a  
240 generic pulsatile flow response. The pulsatile signal was then modelled for different  
241 baseline partial volumes and SNR levels. As seen in Fig.2A the quality of the CBFV  
242 weighted pulsatile signal is a function of both baseline partial volume and SNR,  
243 which determines the fidelity with which single beats can be resolved. Fig.2B plots  
244 the agreement of the simulated signal with the pulsatile CBFV waveform, and it can  
245 be seen that even in the lowest partial volume and SNR case, although individual  
246 beats can't be seen, with sufficient averaging (100 beats) the MR signal still shares  
247 more than 50% variance with the pulsatile CBFV. In cases of high SNR and baseline

248 partial volume, easily achievable *in-vivo*, the individual beats can be resolved with  
249 high fidelity.

A

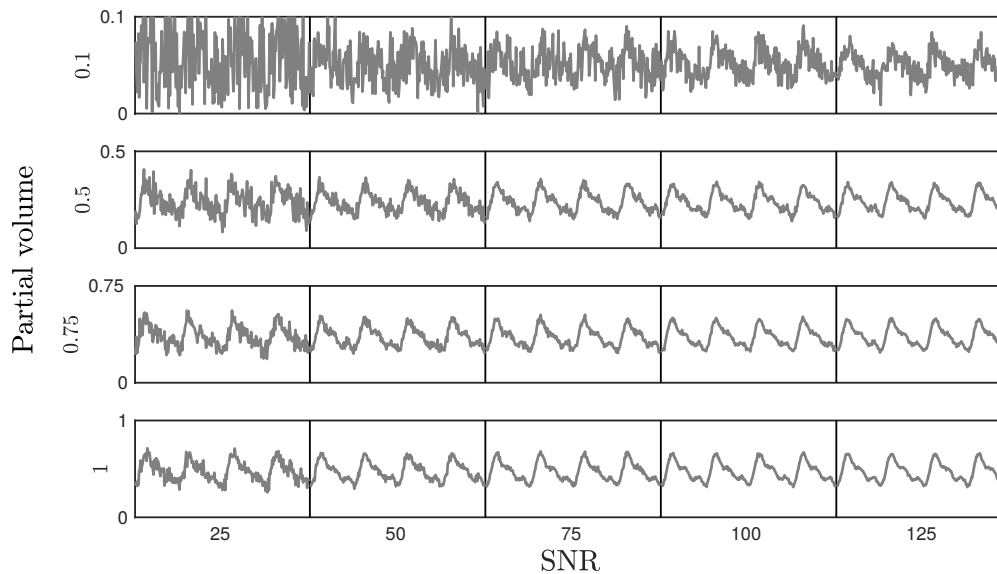

B

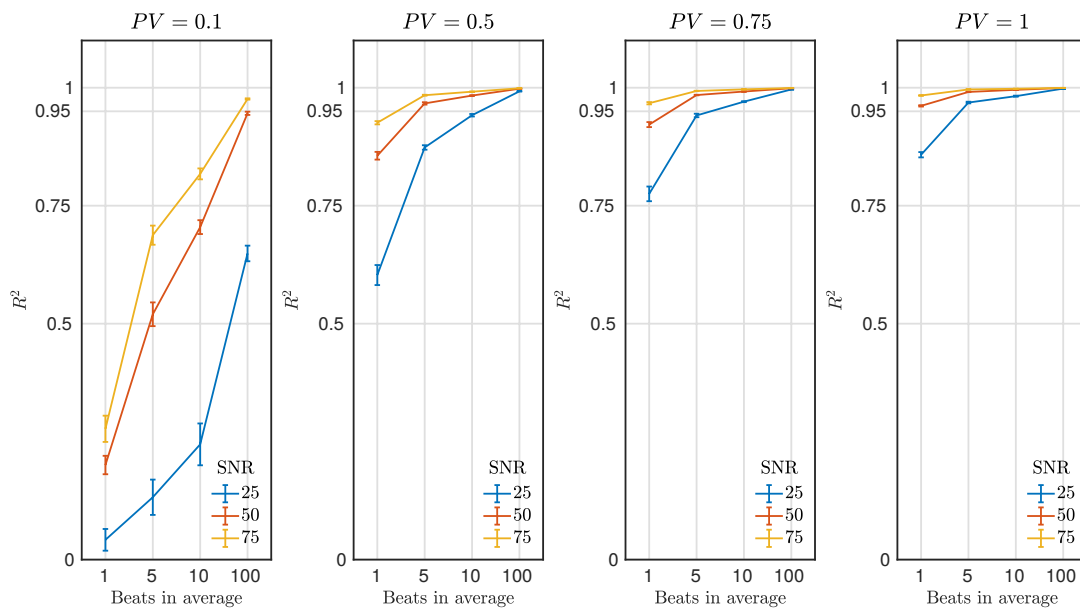

250

251 **Figure 2: A) Simulated DIMAC signal over 4 beats. Each panel represents a different partial volume (row)**  
252 **and SNR condition (column). Note the different y-axis scale for each partial volume. Thus, for a given**  
253 **SNR, increased partial volume of arterial blood increases signal magnitude and yields a stronger**  
254 **pulsatile signal. B) Each panel shows the amount of variance explained in the true CBFV waveform by**  
255 **the simulated DIMAC signal as a function of number of beats included in the average. Naturally, as the**  
256 **number of beats included in the average increases more noise is averaged out, and thus the  $R^2$**   
257 **increases. However this also shows that when both partial volume and SNR are sufficiently high,**  
258 **individual beats can be resolved with high fidelity (i.e. a high  $R^2$  with respect to the true CBFV waveform).**

## 259 **2.2. Experimental Protocol**

260 We performed two separate *in-vivo* MRI experiments using a highly accelerated  
261 GRE echo-planar-imaging (EPI) acquisition to demonstrate the potential of the  
262 DIMAC method as follows: i) an experiment to estimate the steady-state cardiac  
263 induced pulsatile flow response in the middle cerebral artery (MCA), using a  
264 hypercapnia challenge to demonstrate the sensitivity of DIMAC to subtle changes in  
265 vascular tone (*HC-challenge* experiment); ii) a dynamic experiment during a thigh  
266 cuff release (TCR) challenge to demonstrate sensitivity to dynamic changes in the  
267 non-pulsatile component of CBFV, and beat-to-beat pulsatile flow velocity (*TCR-*  
268 *challenge* experiment). Finally, we also performed a simple flow phantom experiment  
269 with the same acquisition in order to verify the strong flow velocity dependent signal  
270 that is predicted in the very short TR domain (included in *Supplementary material*).

### 271 2.2.2. Imaging protocol

272 All experiments described below were performed on a Siemens 3T MAGNETOM  
273 Prisma clinical scanner with a 32-channel receiver head-coil (Siemens Healthcare  
274 GmbH, Erlangen), and used a prototype single slice GRE EPI sequence, with the  
275 number of repetitions varied according to the experimental requirements (see  
276 following sections). The protocol was optimized for maximum sensitivity to the inflow  
277 effect by making the TR as short as possible. This included removing fat saturation  
278 pulses and using ramp sampling. Acquisition parameters were as follows: flip  
279 angle=90°, FOV=192mm (2 mm<sup>2</sup> in-plane resolution), GRAPPA=5, partial Fourier =  
280 6/8, TR=15ms, TE=6.8ms, slice thickness=10mm. For all *in-vivo* experiments  
281 standard TOF scans were performed in order to guide the placement of DIMAC  
282 slices perpendicularly to the artery of interest. All participants gave written informed  
283 consent, and the School of Psychology Cardiff University Ethics Committee  
284 approved the study in accordance with the guidelines stated in the Cardiff University  
285 Research Framework (version 4.0, 2010). Data are publically available through the  
286 Open Science Framework (DOI 10.17605/OSF.IO/ZQ5E3).

### 287 2.2.3. In-vivo experiments

288 2.2.3.1. *HC-challenge experiment*

289 An experiment was performed in 5 healthy participants to demonstrate the sensitivity  
290 of DIMAC to measuring arterial pulsatility in-vivo. A hypercapnia challenge (HC) in  
291 which two distinct levels of partial pressure of end-tidal CO<sub>2</sub> (P<sub>ET</sub>CO<sub>2</sub>) were targeted  
292 was used as a global vasodilatory stimulus in order to model subtle changes in  
293 vascular tone.

294 For each subject a series of scans was performed, which included acquisitions with  
295 the default protocol (TR = 15 ms, 4096 repetitions), and 3 modified acquisitions in  
296 which the TR was increased by a factor of 2 (i.e. TR = 30,60, and 120 ms). For the  
297 modified acquisitions the number of repetitions was adjusted likewise by a factor of 2  
298 (i.e. 2048, 1024, and 596 repetitions), such that the scan length was always exactly  
299 61.44 seconds. In addition to modifying TR, scans were also performed at 3 distinct  
300 levels of P<sub>ET</sub>CO<sub>2</sub>, in which levels were defined with respect to individual subject  
301 baseline levels, which were determined during the initial set up period during the  
302 experiment. For each TR protocol, acquisitions were repeated at normocapnia (+0  
303 mm Hg w.r.t. baseline), and two levels of hypercapnia (+4 and +8 mm Hg w.r.t.  
304 baseline). Thus, for each subject a series of twelve scans in total was performed, i.e.  
305 each of the 4 TR protocols at each of the 3 hypercapnia levels. The experiment  
306 therefore had a factorial design with 2 factors (TR and HC) with 4 and 3 levels  
307 respectively (TR15, TR30, TR60, and TR120; HC0, HC4, and HC8). For each HC  
308 level the order of scans was the same (TR15, TR30, TR60, TR120), but the order of  
309 HC levels was randomised across subjects.

310 The details of the HC experiment are as follows. A tight fitting mask was used to  
311 manually deliver gas through a system of custom-made flow meters, as previously  
312 described (Whittaker et al., 2016). A sampling line connected to the mask was used  
313 to monitor P<sub>ET</sub>CO<sub>2</sub> levels, and flow of medical air and 5% CO<sub>2</sub> was manually  
314 adjusted to target discrete levels (+4 and +8 mm Hg) above the participant's  
315 predetermined baseline value. The baseline level was determined on an individual  
316 subject bases at the beginning of each scanning session. The mask circuit setup  
317 allowed gases to mix in a length of tubing before reaching the mask, and a minimum  
318 total flow rate of 30 L/min was maintained at all times. For the normocapnia scans  
319 only medical air was delivered. For hypercapnia scans the flow rates were adjusted

320 to achieve the desired target prior to the start of the acquisition, with sufficient time  
321 given to ensure a steady state was reached. Flow was always returned to medical air  
322 in between HC levels to allow subjects to return to baseline, and subjects were given  
323 ~1-2 min of recovery at baseline between hypercapnia levels. The start of a new  
324 hypercapnia level and delivery of CO<sub>2</sub> gas was always preceded with the subject's  
325 verbal consent. For each hypercapnia period, at least 1 minute was allowed when  
326 transitioning to a new P<sub>ET</sub>CO<sub>2</sub> level in order to ensure a steady state at the target  
327 end-tidal value was reached. As there were different TR protocols for each HC level,  
328 each lasting ~1 min, when factoring in transitions, subjects were only ever at a  
329 particular hypercapnic level for ~5-10 min. Fig.2 in the *Supplementary material*  
330 shows an example PETCO<sub>2</sub> trace and relative scan timings for one subject. All  
331 subjects tolerated the HC challenge well and none reported and significant  
332 discomfort. Additionally, photoplethysmography (PPG) traces were recorded  
333 concurrently to provide an independent measure of the cardiac cycle.

#### 334 2.2.3.2 TCR-challenge experiment

335 An experiment was performed in a single subject to demonstrate the utility of DIMAC  
336 for measuring changes in flow/pulsatility dynamically. In order to modulate flow we  
337 used a thigh cuff release (TCR) challenge, as it is known to cause a robust transient  
338 drop in blood pressure (Aaslid et al., 1989; Mahony et al., 2000). A single transverse  
339 slice was placed in the neck at a position approximately perpendicular to both the  
340 internal carotid arteries (ICA) and vertebral arteries (VA), as shown in Fig. 3C. The  
341 TCR protocol, detailed here in conference abstract form (Whittaker et al., 2020), was  
342 briefly as follows: Pneumatic cuffs were placed around the tops of both thighs and  
343 inflated to +40 mm Hg above baseline systolic BP pressure for 152 s and then  
344 rapidly deflated. Scanning of the DIMAC acquisition was timed such that data  
345 collection began 20 s before deflation, and each scan lasted ~60s (4096 repetitions).  
346 A series of 5 TCR manoeuvres were repeated, and both concurrent PPG and beat-  
347 to-beat blood pressure (Caretaker, Biopac) traces were recorded.

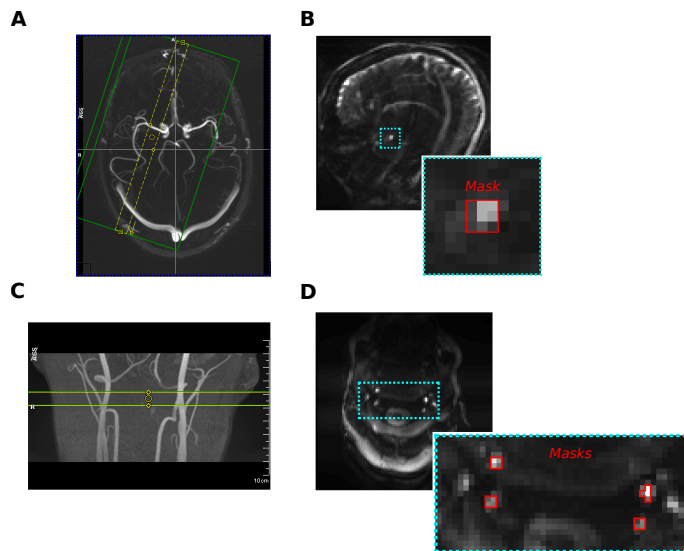

348

349 **Figure 3: A) An example of the slice placement at the M1 segment of the MCA for the *HC-challenge***  
350 **experiment. B) An example DIMAC image, including MCA mask. C) Slice placement for the subject in the**  
351 ***TCR-challenge* experiment placed to include best perpendicular placement of bilateral ICAs and VAs. D)**  
352 **Subject's DIMAC EPI image and artery masks.**

### 353 **2.3. Analysis**

#### 354 2.3.2. In-vivo experiments

355 Data for both in-vivo experiments were processed using AFNI (Cox, 1996) and  
356 MATLAB. All images were first motion corrected using AFNI's 2dImReg function and  
357 filtered to remove linear drifts. Subsequent analysis of the data was performed on  
358 ROI average time series and is described below. For the TR15 condition, pulsatile  
359 CBFV weighting in the signal is sufficiently high such that the periodic signal is  
360 clearly visible and we could perform peak detection to identify each cardiac cycle  
361 without the need for the external PPG, which we refer to as *Beat-to-beat fit* and  
362 describe below. For the other TR conditions this peak detection is no longer  
363 possible, but the pulsatile component of the signal can still be extracted by using the  
364 PPG as an external reference of the cardiac phase, which we refer to as *Cardiac*  
365 *binned average*, and describe below. However, with this method, only a time  
366 average pulsatile component can be extracted.

##### 367 2.3.2.1. Cardiac binned average

368 As has been previously done with PC and fMRI approaches, we can use the PPG as  
369 an external reference to determine in which phase of the cardiac cycle a particular  
370 MR image was acquired. *Systolic* peaks were detected in the PPG signal, and then  
371 each beat-to-beat interval was split into a set of  $n$  cardiac bins. Thus, individual data  
372 points in the time series could be sorted into one of these  $n$  bins, and then averaged  
373 into a new  $n$  point cardiac phase time series, representing the time averaged  
374 pulsatile component of the signal. As the sampling rate is different for each TR  
375 protocol, the number of bins  $n$  was varied to be approximately half the sampling rate,  
376 according to equation 4.

$$n = \left\lceil \frac{1}{2TR} \right\rceil$$

377 where  $\lceil x \rceil$  is the ceiling function that rounds  $x$  up to the next integer value. With this  
378 method we also calculated a time averaged pulsatility index (PI), a simple metric for  
379 quantifying the degree of pulsatility in the signal, and defined as the maximum value  
380 of the average signal minus the minimum value divided by the mean.

#### 381 2.3.2.2. *Beat-to-beat fit*

382 As is customary with pulsatile flow waveforms, a Fourier series basis set was used to  
383 model the pulsatile component of the signal. In order to detect this on an individual  
384 beat-to-beat basis the *diastolic* peak of each cardiac cycle was detected (see Fig.  
385 4B), and then, after removal of linear trends, linear regression was used to fit Fourier  
386 basis set to the signal between each pair of *diastolic* peaks. Fig. 4A shows the  
387 average  $R^2$  of individual beat-to-beat fits for the *HC-challenge* experiment (averaged  
388 across HC condition and subject for the TR15 condition only). As expected the  $R^2$   
389 increases with the number of harmonics included in the Fourier basis set and begins  
390 to plateau at 6. Thus, 5 terms (the fundamental frequency + 4 higher order  
391 harmonics) was chosen as the best balance between goodness-of-fit and parsimony,  
392 as increasing to a greater number of terms offers only marginal increases in  $R^2$ , but  
393 at the risk of over-fitting. As each individual beat is characterised by its own set of  
394 Fourier coefficients, the time averaged pulsatile waveform can be modelled by  
395 simply averaging these together, and then estimated with an arbitrary number of  
396 data points.

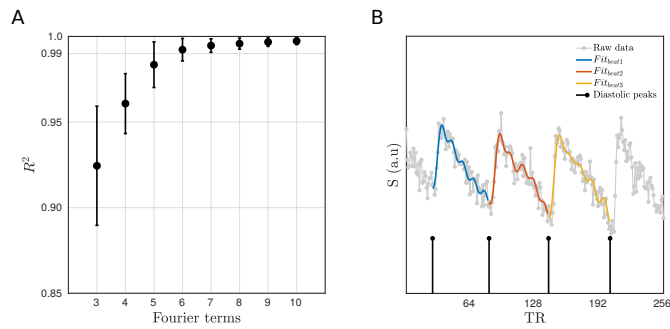

397

398 **Figure 4: A) The average amount of variance explained in the beat-to-beat fit as a function of the number**  
399 **of Fourier terms used. B) An example showing detected *diastolic* peaks and the beat-to-beat pulsatile**  
400 **fits.**

401 Additionally, *systolic* peaks (i.e. maximum signal during systole) were also detected.  
402 Both *diastolic* and *systolic* peaks were up-sampled to the original sampling frequency  
403 to create *diastolic* and *systolic* time series respectively. Thus, the whole time series  
404 could be deconstructed into a non-pulsatile component (i.e. the low frequency  
405 fluctuating *diastolic* peaks), and individual beat-to-beat pulsatile components that  
406 could be characterised by a set of Fourier coefficients. The *diastolic* and *systolic* time  
407 series are equivalent to the envelop of the dynamic pulsatile signal and contain low  
408 frequency information related to the physiological factors that affect the non-pulsatile  
409 component of CBFV.

#### 410 2.3.2.3. *HC-challenge experiment*

411 For each subject, ROIs located at the MCA were defined from the average image  
412 across all scans, as a 9 voxel mask encompassing the artery, which was selected  
413 manually such that the centre voxel was the brightest in the region of the artery (see  
414 Fig.1B). For the default protocol (TR15), each ROI time series was processed using  
415 the *Beat-to-beat fit* method described above. Fourier coefficients for each individual  
416 beat were averaged together and then the time-averaged waveform was  
417 reconstructed with 100 data points. Additionally, the ROI time series were also  
418 processed using the *Cardiac binned* average method in order to calculate and  
419 compare the PI across all TR conditions. The PI was calculated for each TR and HC  
420 condition, and then a repeated-measures ANOVA was used to test for an effect of  
421 TR on PI, after averaging across HC levels.

#### 422 2.3.2.2. *TCR-challenge experiment*



423 For each subject 4 ROIs were created encompassing the ICAs and VAs bilaterally as  
424 follows; the brightest voxel in the region of each artery was used to define the centre  
425 of a 5x5 voxel search space, within which the 4 brightest voxels were selected to  
426 form a mask. As shown in Fig.1.D, voxels in all masks were contiguous to create a  
427 single ROI for each artery. Average time-series were extracted from each ROI and  
428 then processed using the *Beat-to-beat fit* method described above.

### 429 **3. Results**

#### 430 3.1. In-vivo experiments

##### 431 3.1.2. *HC-challenge experiment*

432 The theory predicts that in the “DIMAC regime” there is a strong sensitivity to  
433 pulsatile CBFV, and comparing the signal from the different TR conditions empirically  
434 supports this. A strongly periodic pulsatile signal is evident in the time series for the  
435 TR15 condition, but is far less visible for the TR30 condition, and not readily visible  
436 for the TR60 and TR120 conditions (see Fig 5A), as predicted by the theory. This is  
437 also reflected in the power spectra, with the power of the fundamental cardiac  
438 frequency clearly reducing as a function of TR, and higher order harmonics  
439 becoming less well defined also (see Fig 5A). Fig 5B shows the PI for each TR and  
440 HC condition. It is clear, as expected, that the PI is strongly dependent on TR  
441 condition, and this is quantitatively verified by the results of a repeated measures  
442 ANOVA on PI, which shows a significant effect of TR ( $p=0.00062$ ).

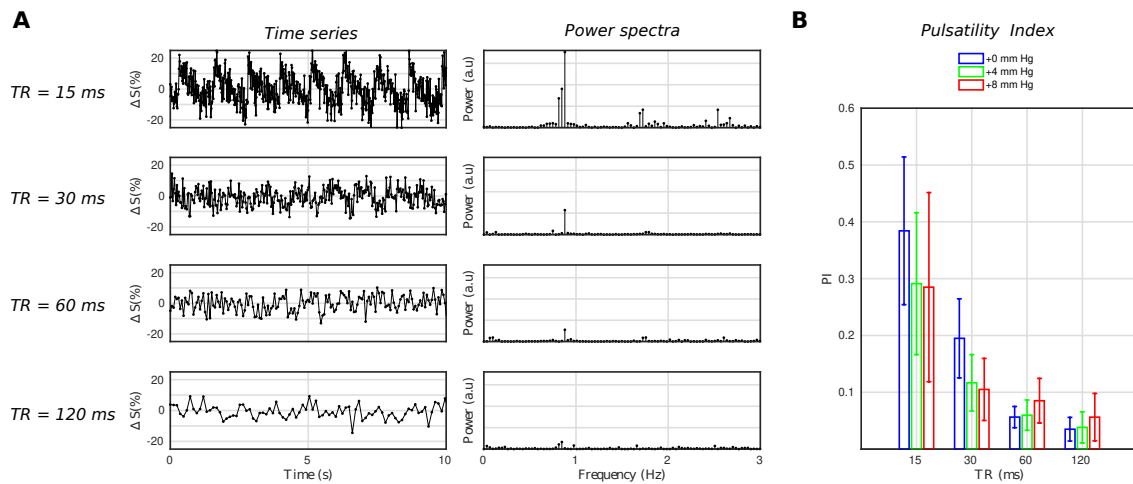

443

444 **Figure 5: A) Example (subject 1) time series and their power spectra for each TR condition. Both the time**  
445 **series and power spectrum make it clear that there is a strong degree of pulsatility for the TR15**  
446 **conditions, which falls away with higher TR values as predicted by the theory. B) The pulsatility index for**  
447 **each TR and HC condition, which quantitatively confirms that which is observed in A.**

448 Figure 6A shows the first 15 s of the DIMAC time series for each subject in the HC0  
449 condition, along with the beat-to-beat fit. Qualitatively one can observe differences in  
450 the pulsatile signal shape across subjects, which is more clearly seen in the average  
451 responses for each subject in Fig. 6B. One can also see in Fig. 6A that there is beat-  
452 to-beat variability in the pulsatile signal, for example in the subject presented in the  
453 fifth row, one can see that the first few beats are qualitatively different in shape to the  
454 later beats.

455 Fig. 6C shows the group average cardiac phase waveforms across different HC  
456 conditions. The cardiac phase waveforms show at least two clear peaks, which are  
457 consistent with what is observed with TCD (Kurji et al., 2006; Robertson et al., 2008),  
458 with the first one representing the systolic peak, and the second one representing a  
459 reflection wave, preceded by the so called “Dicrotic notch”, related to a transient  
460 increase in pressure associated with the aortic valve closing. Qualitatively there is a  
461 clear modulation of the waveform baseline with increasing levels of hypercapnia, due  
462 to increased flow velocity, and also clear modulation of the waveform shape. With  
463 increased hypercapnia the two peaks become broader, and less clearly separated  
464 from one another. There is also evidence of an additional reflection peak appearing  
465 on the downward slope of the primary peak, which becomes more pronounced with  
466 increasing hypercapnia and has previously been demonstrated with TCD (Robertson

467 et al., 2008). Closer peaks may indicate resonance effects produced by pressure  
468 waves in shorter vascular systems (Nichols et al., 2011).

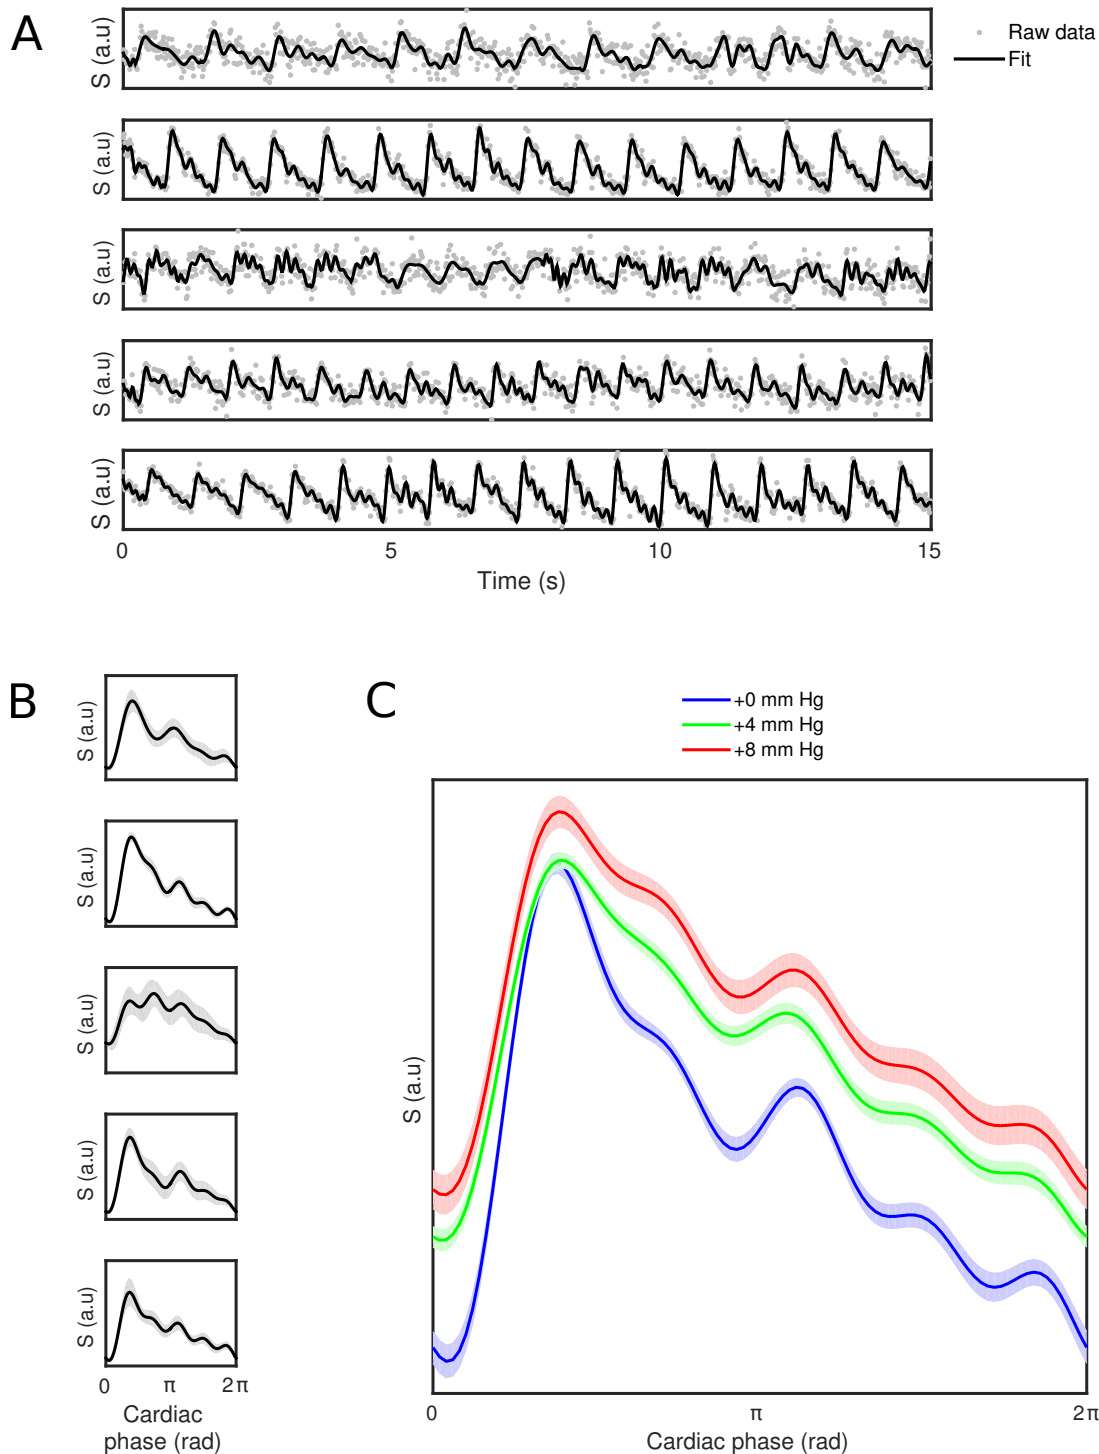

469

470 **Figure 6: A) First 15s of time series for each subject for HC-challenge data (TR15 and HC0 condition),**  
471 **with beat-to-beat fit overlaid. B) The mean pulsatile waveform ( $\pm$ SD shaded area) for each subject (TR15**  
472 **and HC0 condition). C) The across subject mean pulsatile waveforms ( $\pm$ within subject error shaded area)**

473 for each HC condition of the HC-challenge. Qualitatively one can see the pulsatile waveform shape is  
474 modulated by hypercapnia.

475

### 476 3.2.2. TCR-challenge experiment

477 Fig. 7A shows the first 15 seconds of the L-ICA DIMAC signal along with the beat-to-  
478 beat fit and the signal *diastolic* and *systolic* peaks. A very strong periodic signal is  
479 clearly observable, with the prominent systolic and wave reflection peaks discernable  
480 on a beat-to-beat basis. Figure 5B shows the full *systolic* and *diastolic* peak time  
481 courses of the signal during the thigh cuff release challenge in both left and right ICA  
482 and VAs. The magnitude of the signal changes are larger in the ICAs than in the  
483 VAs, and the traces appear smoother, which is perhaps not surprising given that the  
484 ICAs are larger arteries (diameter of ~5 mm compared with ~3 mm for VA), and thus  
485 will have higher SNR. The event-locked change in the CBFV evoked by the TCR is  
486 present in the signal *systolic* and *diastolic* peak time courses, and is clearly seen  
487 bilaterally in the ICA, but only partially in the VA, primarily in the left branch.  
488 Interestingly, it is also clear that the TCR response in the ICA *systolic* peak time  
489 series is delayed with respect to the *diastolic* peak time series. Furthermore, the  
490 *diastolic* peak response shows a marked drop in amplitude, followed by a  
491 subsequent overshoot, whereas the *systolic* peak response shows a simple slowly  
492 evolving increase in amplitude and return to baseline. *Supplementary material* Fig.3  
493 examines the TCR response more closely in the ICA DIMAC *systolic* and *diastolic*  
494 peak time series and compares them with the heart rate and mean arterial blood  
495 pressure responses, which demonstrates that these DIMAC signal changes are  
496 clearly of a physiological origin.

497

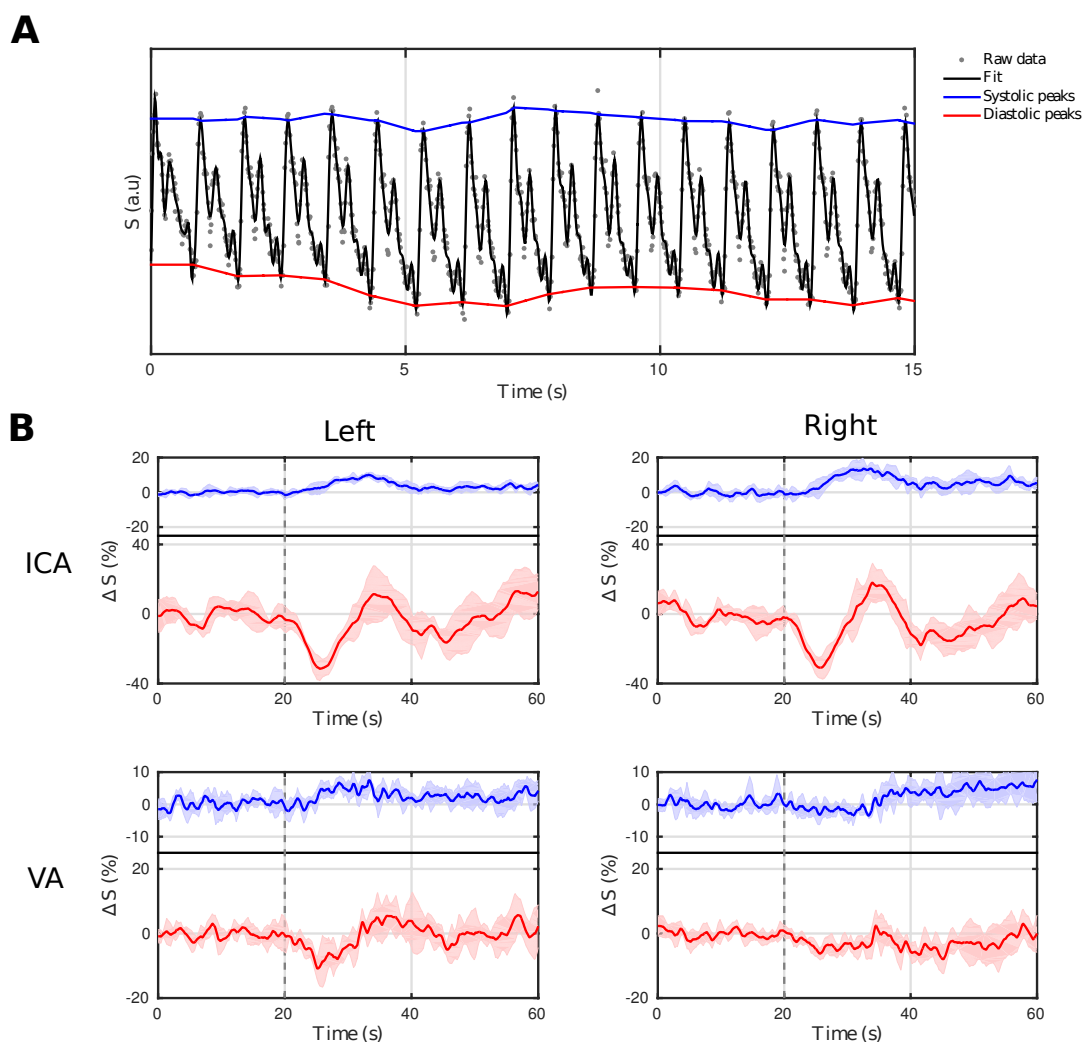

498

499 **Figure 7: A) First 15s of the TCR-challenge time series taken from the left ICA ROI. B) The systolic (blue)**  
 500 **and diastolic (red) peak time series (i.e. signal envelope) averaged across the five repeats, for both ICA**  
 501 **and VA bilaterally. The onset of the thigh-cuff release is highlighted with a dotted grey line. Both left and**  
 502 **right ICA show clear time locked responses to the TCR-challenge in both systolic and diastolic time**  
 503 **series. The same responses are far less evident in the VA time series, particularly in the right side.**

#### 504 **4. Discussion**

505 In this paper we have proposed a new approach, which we have dubbed Dynamic  
 506 Inflow Magnitude Contrast (DIMAC), for studying cerebral arterial pulsatile flow.  
 507 Using a two-compartment model we simulated the spoiled GRE signal, and have  
 508 shown that at short TRs and high flip angles, it is strongly sensitive to pulsatile  
 509 CBFV. We propose that this DIMAC signal regime is a promising new way to  
 510 measuring pulsatile arterial flow, which we support with *in-vivo* data. Bianciardi et al  
 511 previously advanced the GRE MRI signal as a tool for measuring pulsatility in the

512 brain (Bianciardi et al., 2016). Their approach was designed to yield only sensitivity  
513 to CBV, by choosing acquisition parameters that resulted in no sensitivity to realistic  
514 blood flow velocities (i.e. a very low critical velocity  $v_c$ ). However, as outlined in this  
515 study, the theory suggests that an alternative strategy may be more beneficial,  
516 particularly when focussing on large arteries. We have shown that in the “DIMAC  
517 regime” of short TR and high flip angle, when focussed on large cerebral arteries, the  
518 high sensitivity to the inflow effect in the spoiled GRE signal creates a novel CBFV  
519 dependent image contrast that allows pulsatile flow to be measured with high  
520 sensitivity. Compared to traditional techniques, the DIMAC method offers very high  
521 temporal resolution, akin to TCD, which allows the individual beat-to-beat pulsatile  
522 component of flow to be resolved, but whilst retaining the advantages of MRI.  
523 Furthermore, when considering large arteries, the physiological conditions greatly  
524 favour the DIMAC method over CBV based approaches. This is because these large  
525 arteries show only fractionally very small cardiac induced volume changes,  
526 compared with the large dynamic range seen in CBFV.

#### 527 4.1. Dynamic measurements

528 A major advantage of the DIMAC approach we have outlined is the ability to  
529 measure pulsatile flow dynamically, and resolve individual beat-to-beat pulsatile  
530 waveforms. The current preferred MRI approach for measuring arterial pulsatility is  
531 PC-MRI, although with this method CBFV measurements are not usually made  
532 continuously, but rather are averaged over many cardiac cycles. Depending on the  
533 temporal width of the bins into which the cardiac phase is separated, this typically  
534 leads to significant morphological differences between PC-MRI and TCD CBFV  
535 waveforms (Wagshul et al., 2011), best characterised as a loss of fine structure, i.e.  
536 fewer clearly resolved distinct peaks and troughs. These key features (peaks and  
537 troughs and their relative timings) that have been used to characterise the CBFV  
538 waveform in the TCD literature (Aggarwal et al., 2008; Kurji et al., 2006; Lockhart et  
539 al., 2006; Robertson et al., 2008), are often integral to attempts to indirectly derive  
540 higher order measures of the cerebrovascular system such as intracranial pressure  
541 and cerebral perfusion pressure (Aggarwal et al., 2008), or downstream compliance  
542 (Robertson et al., 2008). In this study a simple averaging of Fourier terms was used  
543 to reduce noise and characterise pulsatility both at the subject and group level, but in

544 theory more complex processing strategies could be used that incorporate the non-  
545 stationary nature of the cardiac cycle, and crucially the ability to resolve individual  
546 beats permits higher level measures of variability to be obtained. Thus, the  
547 continuous measurement and beat-to-beat sensitivity of DIMAC not only allows  
548 pulsatile waveforms to be measured with higher fidelity, but also allows the inherent  
549 (and physiologically relevant) variability to be quantified.

550 In addition to the aforementioned benefits with regard to characterising pulsatility, the  
551 continuous measurement approach also preserves the non-pulsatile components of  
552 CBFV. This is important because arterial health is not only concerned with the  
553 passive transmission of pulsatile energy throughout the system, and thus the  
554 resulting and measurable pulsatility, but also the more active processes of CBF  
555 regulation that occurs via multitude of local, neural, metabolic and mechanical  
556 factors. Dynamic cerebral autoregulation (CA) of CBF, which is critically important for  
557 neurological health, depends on the healthy function of arteries, and evidence  
558 suggests that atherosclerotic associated changes lead to adaptive remodelling that  
559 results in both reduced basal flow (Silver and Vita, 2006) and reduced vascular  
560 reactivity (Kim et al., 2009). Thus, MRI methods such as DIMAC that, like TCD, offer  
561 high temporal resolution continuous flow measurement in which both pulsatile and  
562 non-pulsatile components are resolved, are highly desirable. We demonstrated the  
563 utility of the DIMAC method to this end by showing its sensitivity to physiological  
564 changes induced by a transient blood pressure challenge. Although we have only  
565 considered the *systolic* and *diastolic* peak time series signal, there is clearly huge  
566 scope for new pulse wave analysis approaches to be developed. New clinical tools  
567 based on MRI derived dynamic metrics of cerebral arterial function are highly  
568 desirable for conditions such as Alzheimer's disease, with which impaired CA and  
569 vasomotor function are thought to be important (Claassen and Zhang, 2011; Di  
570 Marco et al., 2015; Niwa et al., 2002; Zhou et al., 2019), but have hitherto remained  
571 relatively less well studied.

#### 572 4.2. Flow velocity

573 The basis of the method outlined in this study is that the spoiled GRE signal  
574 becomes very sensitive to flow velocity in the DIMAC regime of short TR and high

575 flip angle. This fact in conjunction with the physiology of flow in large arteries makes  
576 it useful for efficiently measuring pulsatility in these arteries. One inherent limitation  
577 to this approach is the critical velocity  $v_c$  that determines the upper limit of sensitivity.  
578 Unlike the PC-MRI approach where the limits of sensitivity can be more easily  
579 manipulated by appropriately choosing the velocity encoding (VENC) parameter,  
580 with the DIMAC method, fundamental physical and hardware limitations and practical  
581 considerations effectively determine  $v_c$ . However, unlike PC-MRI where  
582 misspecification leads to aliasing of velocities that exceed the VENC, with DIMAC  
583 the signal merely saturates at velocities exceeding  $v_c$ . The parameters used here  
584 predict a  $v_c$  of  $\sim 67 \text{ cm s}^{-1}$ , which is below the peak velocity one might expect to  
585 measure for ICAs, and on the limit for MCAs (Brant, 2001), which risks losing  
586 sensitivity to the most central lamina of the cross-sectional flow distribution.

587 Additionally, a benefit of PC-MRI is that it renders a pure CBFV contrast in the phase  
588 signal, which with careful consideration of acquisition and analysis protocols can be  
589 quantified in meaningful units. The primary purpose of this study was to demonstrate  
590 the principle of DIMAC and so in its current implementation provides a non-  
591 quantitative assessment of a predominantly CBFV weighted signal. However, in the  
592 *Supplementary material* we include the results of a flow phantom study, which shows  
593 how in principle DIMAC may be extended to yield quantitative CBFV measurements.  
594 This is achieved by acquiring a separate  $M_0$  image (i.e. one with a sufficiently long  
595 TR such that the flowing blood only experiences a single RF pulse), which is then  
596 used to scale velocity dependent magnetisation in equation 1. The results of this  
597 simple experiment suggest that with further research efforts, quantitative CBFV  
598 estimates might be obtained. The main barrier to this in the present study is the  
599 limited spatial resolution, which will result in partial volume effects with CSF and  
600 contributions to the signal from changes in CBV (Bianciardi et al., 2016; Viessmann  
601 et al., 2017). Such partial volume effects lead to multiple sources of signal contrast  
602 that present a challenge for clinically useful interpretations of pulsatile flow  
603 waveforms (Viessmann et al., 2017). However, as demonstrated by the simulations  
604 presented in Fig.1, in the DIMAC regime the signal from static spins is effectively  
605 nulled, due to the saturating effect of a train of short interval, high flip angle RF  
606 pulses, so non-blood partial volumes only contribute marginally to the total signal  
607 variance. Still, this topic warrants further investigation, and analysis with a better



608 informed multi-compartment model, may well be a fruitful avenue for future research,  
609 and prove useful for separating the effects of CBFV, CBV and CSF partial volume  
610 changes. Furthermore, as the theory suggest that non-blood partial volumes will  
611 reduce the overall magnitude of the signal, but not affect the sensitivity to CBFV with  
612 respect to CBV (see Fig.1B), this implies that by going to high field strengths one  
613 may leverage the inherent increased SNR to target smaller sub-voxel arteries.

614 Finally, the sensitivity analysis included in the theory section is based on the  
615 assumption of plug flow, which cannot be assumed in the true physiological case.  
616 For the purposes of making a broad statement about the signal sensitivity we don't  
617 believe this to be a significant limitation, however it is something that should be  
618 considered in future work. Modelling the signal with a more realistic laminar flow  
619 profile may help to optimise the acquisition further as the sensitivity profile presented  
620 in Fig.1A may be overly simplified. Furthermore, it may be useful for optimising the  
621 acquisition for more targeted assessment of different arterial sites and scales (i.e.  
622 considering smaller arteries than here), based on detailed a priori information about  
623 the specific flow profile.

#### 624 4.3. Acquisition considerations

625 Single-shot EPI was chosen here because of its efficiency, which is necessary for  
626 the short sampling rates required for DIMAC, however it is limited in its achievable  
627 spatial resolution, and is associated with various artifacts and distortions due to the  
628 overall long sampling period. Although we have shown here that the relatively poor  
629 image fidelity of our EPI implementation does not present a major obstruction to the  
630 overall aim of extracting high temporal resolution pulsatile flow information, that is  
631 not to say that improvements in image quality or spatial resolution would not be  
632 beneficial. Alternatively, this limitation may be better addressed directly by exploring  
633 different sampling schemes that permit higher spatial resolutions, but still keep TR  
634 short (and thus saturation of static tissues high), such as multi-shot segmented EPI.  
635 Furthermore, reductions in TR become increasingly difficult without using small flip  
636 angles due to SAR restrictions. As the limits of the technique are pushed, alternative  
637 low SAR pulse options may also need to be considered, such as using the VERSE  
638 technique (Conolly et al., 1988; Hargreaves et al., 2004).

## 639 **5. Conclusion**

640 The pulsatile nature of arterial blood flow provides a clinically relevant insight into  
641 arterial structure/function and its effect on cerebral health. In this study, we  
642 demonstrate the feasibility of a new approach to measuring pulsatile flow in cerebral  
643 arteries by exploiting the inflow effect that is present in highly accelerated GRE  
644 acquisitions. We have shown that the efficiency of this DIMAC approach allows for  
645 dynamic beat-to-beat assessment of pulsatile flow without requiring averaging  
646 across cardiac cycles. Measured responses to the thigh cuff challenge demonstrate  
647 the power of this technique to observe transient cerebrovascular processes in  
648 multiple vessels in the brain, opening up the possibility of studying blood flow  
649 dynamics and cerebral autoregulation to multiple distinct brain regions. Furthermore,  
650 we have shown that the technique is sensitive to subtle changes in physiology as  
651 demonstrated here using a hypercapnic challenge. We believe this novel DIMAC  
652 method provides a promising new approach for studying cerebral arterial function,  
653 which will ultimately be valuable in researching arterial function in ageing and  
654 cerebrovascular disorders such as dementia and small vessel disease.

## 655 **6. Acknowledgments**

656 This work was funded in whole, or in part, by the Wellcome Trust [WT200804]. For  
657 the purposes of Open Access, the author has applied a CC BY public copyright  
658 license to any Author Accepted Manuscript version arising from this submission.  
659 Thanks to Peter Weale for valuable input during pilot scanning.

## 660 **7. Declaration of interest**

661 Fabrizio Fasano and Patrick Liebig are employees of Siemens Healthcare. Joseph  
662 Whittaker, Fabrizio Fasano, Patrick Liebig, and Kevin Murphy are all named  
663 inventors on a patent (Patent No: US 10,802,100 B2. Date of Patent: Oct 13, 2020)  
664 which covers aspects of this research (Whittaker, 2019).

665

## 666 8. References

667

668 Aaslid, R., Lindegaard, K.F., Sorteberg, W., Nornes, H., 1989. Cerebral autoregulation dynamics in  
669 humans. *Stroke* 20, 45-52.

670 Aggarwal, S., Brooks, D.M., Kang, Y., Linden, P.K., Patzer, J.F., 2nd, 2008. Noninvasive monitoring  
671 of cerebral perfusion pressure in patients with acute liver failure using transcranial doppler  
672 ultrasonography. *Liver Transpl* 14, 1048-1057.

673 Atwi, S., Robertson, A.D., Theyers, A.E., Ramirez, J., Swartz, R.H., Marzolini, S., MacIntosh, B.J.,  
674 2020. Cardiac-Related Pulsatility in the Insula Is Directly Associated With Middle Cerebral Artery  
675 Pulsatility Index. *Journal of Magnetic Resonance Imaging* 51, 1454-1462.

676 Berman, S.E., Rivera-Rivera, L.A., Clark, L.R., Racine, A.M., Keevil, J.G., Bratzke, L.C., Carlsson,  
677 C.M., Bendlin, B.B., Rowley, H.A., Blennow, K., Zetterberg, H., Asthana, S., Turski, P., Johnson, S.C.,  
678 Wieben, O., 2015. Intracranial Arterial 4D-Flow is Associated with Metrics of Brain Health and  
679 Alzheimer's Disease. *Alzheimers Dement (Amst)* 1, 420-428.

680 Bianciardi, M., Toschi, N., Polimeni, J.R., Evans, K.C., Bhat, H., Keil, B., Rosen, B.R., Boas, D.A.,  
681 Wald, L.L., 2016. The pulsatility volume index: an indicator of cerebrovascular compliance based on  
682 fast magnetic resonance imaging of cardiac and respiratory pulsatility. *Philos Trans A Math Phys Eng*  
683 *Sci* 374.

684 Brant, W.E., 2001. *The Core Curriculum: Ultrasound*. Lippincott, Williams & Wilkins, Philadelphia.

685 Brown, R., Cheng, Y.N., Hacke, E.M., Thompson, M.R., Venkatesan, R., 2014. *Magnetic Resonance*  
686 *Imaging: Physical Principles and Sequence Design*, 2nd ed. John Wiley & Sons, Inc, New Jersey.

687 Claassen, J.A., Zhang, R., 2011. Cerebral autoregulation in Alzheimer's disease. *J Cereb Blood Flow*  
688 *Metab* 31, 1572-1577.

689 Conolly, S., Nishimura, D., Macovski, A., Glover, G., 1988. Variable-rate selective excitation. *Journal*  
690 *of Magnetic Resonance (1969)* 78, 440-458.

691 Cox, R.W., 1996. AFNI: software for analysis and visualization of functional magnetic resonance  
692 neuroimages. *Comput Biomed Res* 29, 162-173.

693 Di Marco, L.Y., Farkas, E., Martin, C., Venneri, A., Frangi, A.F., 2015. Is Vasomotion in Cerebral  
694 Arteries Impaired in Alzheimer's Disease? *J Alzheimers Dis* 46, 35-53.

695 Fluck, D., Beaudin, A.E., Steinback, C.D., Kumarpillai, G., Shobha, N., McCreary, C.R., Peca, S.,  
696 Smith, E.E., Poulin, M.J., 2014. Effects of aging on the association between cerebrovascular  
697 responses to visual stimulation, hypercapnia and arterial stiffness. *Front Physiol* 5, 49.

698 Gao, J.H., Holland, S.K., Gore, J.C., 1988. Nuclear magnetic resonance signal from flowing nuclei in  
699 rapid imaging using gradient echoes. *Med Phys* 15, 809-814.

700 Hargreaves, B.A., Cunningham, C.H., Nishimura, D.G., Conolly, S.M., 2004. Variable-rate selective  
701 excitation for rapid MRI sequences. *Magn Reson Med* 52, 590-597.

702 Hartung, M.P., Grist, T.M., Francois, C.J., 2011. Magnetic resonance angiography: current status and  
703 future directions. *J Cardiovasc Magn Reson* 13, 19.

704 Herscovitch, P., Raichle, M.E., 1985. What is the Correct Value for the Brain-Blood Partition  
705 Coefficient for Water? *Journal of Cerebral Blood Flow & Metabolism* 5, 65-69.

706 Hughes, T.M., Wagenknecht, L.E., Craft, S., Mintz, A., Heiss, G., Palta, P., Wong, D., Zhou, Y.,  
707 Knopman, D., Mosley, T.H., Gottesman, R.F., 2018. Arterial stiffness and dementia pathology:  
708 Atherosclerosis Risk in Communities (ARIC)-PET Study. *Neurology* 90, e1248-e1256.

709 Kim, D.J., Kasprovicz, M., Carrera, E., Castellani, G., Zweifel, C., Lavinio, A., Smielewski, P.,  
710 Sutcliffe, M.P., Pickard, J.D., Czosnyka, M., 2009. The monitoring of relative changes in  
711 compartmental compliances of brain. *Physiol Meas* 30, 647-659.

- 712 Kurji, A., Debert, C.T., Whitelaw, W.A., Rawling, J.M., Frayne, R., Poulin, M.J., 2006. Differences  
713 between middle cerebral artery blood velocity waveforms of young and postmenopausal women.  
714 *Menopause* 13, 303-313.
- 715 Lakatta, E.G., Levy, D., 2003. Arterial and cardiac aging: major shareholders in cardiovascular  
716 disease enterprises: Part I: aging arteries: a "set up" for vascular disease. *Circulation* 107, 139-146.
- 717 Laurent, S., Katsahian, S., Fassot, C., Tropeano, A.I., Gautier, I., Laloux, B., Boutouyrie, P., 2003.  
718 Aortic stiffness is an independent predictor of fatal stroke in essential hypertension. *Stroke* 34, 1203-  
719 1206.
- 720 Lockhart, C.J., Gamble, A.J., Rea, D., Hughes, S., McGivern, R.C., Wolsley, C., Stevenson, M.,  
721 Harbinson, M.T., Plumb, R.D., McVeigh, G.E., 2006. Nitric oxide modulation of ophthalmic artery  
722 blood flow velocity waveform morphology in healthy volunteers. *Clin Sci (Lond)* 111, 47-52.
- 723 Lu, H., Clingman, C., Golay, X., van Zijl, P.C.M., 2004. Determining the longitudinal relaxation time  
724 (T1) of blood at 3.0 Tesla. *Magnetic Resonance in Medicine* 52, 679-682.
- 725 Lu, H., Nagae-Poetscher, L.M., Golay, X., Lin, D., Pomper, M., van Zijl, P.C.M., 2005. Routine clinical  
726 brain MRI sequences for use at 3.0 Tesla. *Journal of Magnetic Resonance Imaging* 22, 13-22.
- 727 Mahony, P.J., Panerai, R.B., Deverson, S.T., Hayes, P.D., Evans, D.H., 2000. Assessment of the  
728 thigh cuff technique for measurement of dynamic cerebral autoregulation. *Stroke* 31, 476-480.
- 729 Mitchell, G.F., Hwang, S.J., Vasan, R.S., Larson, M.G., Pencina, M.J., Hamburg, N.M., Vita, J.A.,  
730 Levy, D., Benjamin, E.J., 2010. Arterial stiffness and cardiovascular events: the Framingham Heart  
731 Study. *Circulation* 121, 505-511.
- 732 Naqvi, J., Yap, K.H., Ahmad, G., Ghosh, J., 2013. Transcranial Doppler Ultrasound: A Review of the  
733 Physical Principles and Major Applications in Critical Care. *International Journal of Vascular Medicine*  
734 2013, 629378.
- 735 Nichols, W.W., O'Rourke, M.F., Vlachopoulos, C., 2011. *McDonald's Blood Flow in Arteries:*  
736 *Theoretical, Experimental and Clinical Principles*, 6th ed. CRC Press.
- 737 Niwa, K., Kazama, K., Younkin, L., Younkin, S.G., Carlson, G.A., Iadecola, C., 2002. Cerebrovascular  
738 autoregulation is profoundly impaired in mice overexpressing amyloid precursor protein. *Am J Physiol*  
739 *Heart Circ Physiol* 283, H315-323.
- 740 O'Rourke, M., Stone, J., Adji, A., Kim, M.O., Li, Y., Wang, J.G., Avolio, A., Eide, P.K., Czosnyka, M.,  
741 2020. *The Human Systemic and Cerebral Circulations: Contrasts in Structure and Function*. Artery  
742 Research.
- 743 Pinto, J., Chappell, M.A., Okell, T.W., Mezue, M., Segerdahl, A.R., Tracey, I., Vilela, P., Figueiredo,  
744 P., 2020. Calibration of arterial spin labeling data—potential pitfalls in post-processing. *Magnetic*  
745 *Resonance in Medicine* 83, 1222-1234.
- 746 Poels, M.M., van Oijen, M., Mattace-Raso, F.U., Hofman, A., Koudstaal, P.J., Witteman, J.C.,  
747 Breteler, M.M., 2007. Arterial stiffness, cognitive decline, and risk of dementia: the Rotterdam study.  
748 *Stroke* 38, 888-892.
- 749 Poels, M.M., Zaccai, K., Verwoert, G.C., Vernooij, M.W., Hofman, A., van der Lugt, A., Witteman, J.C.,  
750 Breteler, M.M., Mattace-Raso, F.U., Ikram, M.A., 2012. Arterial stiffness and cerebral small vessel  
751 disease: the Rotterdam Scan Study. *Stroke* 43, 2637-2642.
- 752 Rabkin, S.W., 2012. Arterial stiffness: detection and consequences in cognitive impairment and  
753 dementia of the elderly. *J Alzheimers Dis* 32, 541-549.
- 754 Rivera-Rivera, L.A., Schubert, T., Turski, P., Johnson, K.M., Berman, S.E., Rowley, H.A., Carlsson,  
755 C.M., Johnson, S.C., Wieben, O., 2017. Changes in intracranial venous blood flow and pulsatility in  
756 Alzheimer's disease: A 4D flow MRI study. *J Cereb Blood Flow Metab* 37, 2149-2158.
- 757 Robertson, J.W., Debert, C.T., Frayne, R., Poulin, M.J., 2008. Variability of middle cerebral artery  
758 blood flow with hypercapnia in women. *Ultrasound Med Biol* 34, 730-740.
- 759 Shirwany, N.A., Zou, M.-h., 2010. Arterial stiffness: a brief review. *Acta Pharmacologica Sinica* 31,  
760 1267-1276.

- 761 Silver, A.E., Vita, J.A., 2006. Shear Stress Mediated Arterial Remodeling in Atherosclerosis.  
762 *Circulation* 113, 2787-2789.
- 763 Suryan, G., 1951. Nuclear resonance in flowing liquids. *Proceedings of the Indian Academy of*  
764 *Sciences - Section A* 33, 107.
- 765 Tong, Y., Frederick, B.d., 2012. Concurrent fNIRS and fMRI processing allows independent  
766 visualization of the propagation of pressure waves and bulk blood flow in the cerebral vasculature.  
767 *Neuroimage* 61, 1419-1427.
- 768 Verwoert, G.C., Franco, O.H., Hoeks, A.P., Reneman, R.S., Hofman, A., CM, V.D., Sijbrands, E.J.,  
769 Wittman, J.C., Mattace-Raso, F.U., 2014. Arterial stiffness and hypertension in a large population of  
770 untreated individuals: the Rotterdam Study. *J Hypertens* 32, 1606-1612; discussion 1612.
- 771 Viessmann, O., Moller, H.E., Jezard, P., 2017. Cardiac cycle-induced EPI time series fluctuations in  
772 the brain: Their temporal shifts, inflow effects and T2( \*) fluctuations. *Neuroimage* 162, 93-105.
- 773 Wagshul, M.E., Eide, P.K., Madsen, J.R., 2011. The pulsating brain: A review of experimental and  
774 clinical studies of intracranial pulsatility. *Fluids and Barriers of the CNS* 8, 5.
- 775 Warnert, E.A., Murphy, K., Hall, J.E., Wise, R.G., 2015. Noninvasive assessment of arterial  
776 compliance of human cerebral arteries with short inversion time arterial spin labeling. *J Cereb Blood*  
777 *Flow Metab* 35, 461-468.
- 778 Warnert, E.A.H., Verbree, J., Wise, R.G., van Osch, M.J.P., 2016. Using High-Field Magnetic  
779 Resonance Imaging to Estimate Distensibility of the Middle Cerebral Artery. *Neurodegenerative*  
780 *Diseases* 16, 407-410.
- 781 Whittaker, J.C., (GB), Fasano, Fabrizio (Cardiff, GB), Heidemann, Robin (Litzendorf, DE), Murphy,  
782 Kevin (Cardiff, GB), , Liebig, Patrick (Erlangen, DE), 2019. METHOD FOR OBTAINING MAGNETIC  
783 RESONANCE IMAGING (MRI) ECHO-PLANAR IMAGE (EPI) DATA. Siemens Healthcare Limited  
784 (Camberley, GB), Cardiff University (Cardiff, GB), Siemens Healthcare GmbH (Erlangen, DE), United  
785 States.
- 786 Whittaker, J.R., Driver, I.D., Bright, M.G., Murphy, K., 2016. The absolute CBF response to activation  
787 is preserved during elevated perfusion: Implications for neurovascular coupling measures.  
788 *Neuroimage* 125, 198-207.
- 789 Whittaker, J.R., Steventon, J.J., Venzi, M., Murphy, K., 2020. Probing dynamic cerebral  
790 autoregulation with BOLD fMRI using a thigh cuff challenge. *Proc. Int. Soc. Magn. Reson. Med,*  
791 *Virtual.*
- 792 Wilkinson, I.B., Cockcroft, J.R., McEniery, C.M., 2015. Aortic stiffness as a cardiovascular risk  
793 predictor. *BMJ* 351, h3764.
- 794 Yan, L., Liu, C.Y., Smith, R.X., Jog, M., Langham, M., Krasileva, K., Chen, Y., Ringman, J.M., Wang,  
795 D.J.J., 2016. Assessing intracranial vascular compliance using dynamic arterial spin labeling.  
796 *Neuroimage* 124, 433-441.
- 797 Yang, T.-H., Jo, G., Koo, J.-H., Woo, S.-Y., Kim, J.U., Kim, Y.-M., 2019. A compact pulsatile simulator  
798 based on cam-follower mechanism for generating radial pulse waveforms. *BioMedical Engineering*  
799 *OnLine* 18, 1.
- 800 Zhao, J.M., Clingman, C.S., Närväinen, M.J., Kauppinen, R.A., van Zijl, P.C.M., 2007. Oxygenation  
801 and hematocrit dependence of transverse relaxation rates of blood at 3T. *Magnetic Resonance in*  
802 *Medicine* 58, 592-597.
- 803 Zhou, G., Zhao, X., Lou, Z., Zhou, S., Shan, P., Zheng, N., Yu, X., Ma, L., 2019. Impaired Cerebral  
804 Autoregulation in Alzheimer's Disease: A Transcranial Doppler Study. *J Alzheimers Dis* 72, 623-631.
- 805
